# Supplementary material for: KLF4 is regulated by RAS/RAF/MEK/ERK signaling through E2F1 and promotes melanoma cell growth
Source: PubMed Central journal article supplement — Oncogene. 2017 Jan 9;36(23):3322–33. doi: 10.1038/onc.2016.481 (PMC5474568; doi:10.1038/onc.2016.481), 2017-01-09
Supplement: onc2016481x3.pdf [file onc2016481x3.pdf]

**KLF4 alpha cDNA**

**ATGGCTGT**CAGCGACGCGCTGCTCCCATCTTTCTCCACGTT**CGCGTCTGGCCCGGGGGAAG**  
GGAGAAGACACT**CGCTCAAGCAGGTGCCCGAATAAC**AGTCATGCCACCCGGTTCCTGCAT  
GCCAGAGACCCCAAGCCAAAGAGGGGAAGACGATCGTGGCCCGGAAAAGGACCGCCACCC  
ACACTTGTGATTACGCGGGCTGCGGCAAACCTACACAAAGAGTTCCCATCTCAAGGCACAC  
CTGCGAACCACACAGGTGAGAAACCTTACCCTGTGACTGGGACGGCTGTGGATGGAATTT  
CGCCGCTCAGATGAACTGACCAGGCACTACCGTAAACACACGGGGCACCGCCGTTCCAGT  
GCCAAAATGCGACCGAGCATTTCAGGTTCGACCACCTCGCCTTACACATGAAGAGGCAT  
TTT**TAA**

**KLF4 Full Length cDNA**

**ATGGCTGT**CAGCGACGCGCTGCTCCCATCTTTCTCCACGTT**CGCGTCTGGCCCGGGGGAAG**  
GGAGAAGACACT**CGCTCAAGCAGGTGCCCGAATAAC**CGCTGGCGGGAGGAGCTCTCCACA  
TGAAGCGACTTCCCCAGTGTCTCCCGCCGCCCCCTATGACCTGGCGGGCGGACCGTGGCC  
ACAGACCTGGAGAGCGCGGAGCCGGTGC GGCTTGC GGCGGTAGCAACCTGGCGCCCTACC  
TCGGAGAGAGACCGAGGAGTTCAACGATCTCCTGGACCTGGACTTTATTTCTCTCCAATTCGC  
TGACCCATCCTCCGGAGTCAGTGGCCGCCACCGTGTCTCGTCAGCGTCAGCCTCCTCTTCG  
TCGTCGCCGTCGAGCAGCGGCCCTGCCAGCGCGCCCTCCACCTGCAGCTTACCTATCCGAT  
CCGGCCCGGGAACGACCCGGGCGTGGCGCCGGGCGGCACGGGCGGAGGCTCCTCTATGGCA  
GGGAGTCCGCTCCCCCTCCGACGGCTCCCTTCAACCTGGCGGACATCAACGACGTGAGCCCC  
TCGGGCGGCTTCGTGGCCGAGCTCCTGCGGCCAGAATTGGACCCGGTGTACATTCGCGCGCA  
GCACCCGACGCCAGGTGGCGGGCTGATGGGCAAGTTCGTGCTGAAGGCGTTCGCTGAGCG  
CCCCTGGCAGCGAGTACGGCAGCCCTCGGTTCATCAGCGTCAGCAAAGGCAGCCCTGACGGC  
AGCCACCCGGTGGTGGTGGCGCCCTACAACGGCGGGCCCGCGCACGTGCCCAAGATCAA  
GCAGGAGGCGGTCTCTTCGTGCACCCACTTGGGCGCTGGACCCCTCTCAGCAATGGCCACC  
GGCCGGCTGCACACGACTTCCCCCTGGGGCGGCAGCTCCCCAGCAGGACTACCCCGACCCTG  
GGTCTTGAGGAAAGTGTGAGCAGCAGGGACTGTCACCTGCCCTGCCGCTTCTCCCGGCTT  
CCATCCCCACCCGGGGCCCAATTACCCATCCTTCCCTGCCCGATCAGATGCAGCCGCAAGTCC  
CGCCGCTCCATTACCAAGAGCTCATGCCACCCGGTTCCTGCATGCCAGAGGAGCCCAAGCCA  
AAGAGGGGAAGACGATCGTGGCCCGGAAAAGGACCGCCACCCACACTTGTGATTACGCGGG  
CTGCGGCAAACCTACACAAAGAGTTCCCATCTCAAGGCACACCTGCGAACCACACAGGTG  
AGAAACCTTACCCTGTGACTGGGACGGCTGTGGATGGAATTCGCCCGCTCAGATGAACTG  
ACCAGGCACTACCGTAAACACACGGGGCACCGCCCGTTCAGTGCCAAAATGCGACCGAGC  
ATTTTCAGGTTCGGACCACCTCGCCTTACACATGAAGAGGCATTTT**TAA**

**KLF4 alpha protein**

1 **mavsdallps fstfasgpag rektlrqaga pnnsschpvp** acqrspsqrg eddrpgpkkp  
61 pptlvitraa akptqrvpis rhtceptqvr nltvtgtav dgnspaqmn

**KLF4 Full Length protein**

1 **mavsdallps fstfasgpag rektlrqaga pnnrwreels** hmkrlppvlp grpydlaaat  
61 vatdlesgga gaacggsnla plprreteef ndlldldfil snslthppes vaatvsssas  
121 assssspsss gpasapstcs ftypiragnd pgvapgggtg gllygresap pptapfnlad  
181 indvspsggf vaellrpeld pvyippqqp ppgggimgkf vlkaslsapg seygspsvis  
241 vskgsdpdsh pvvapyngg pprtckkik eavsscthlg agpplsnghr paahdfplgr  
301 qlpsrttptl gleevlssrd chpalplppg fhphpgpnyp sflpdmqppq vpplhyqqqs  
361 rgfvaragep cvcwphfgth gmmltppssp lelmppgscm peepk**pkrggr** rswprkrtat  
421 htcdyagcgp tytksshka hlrthtgekp yhcdwdgcpw kfarsdeltr hyrkhtghrp  
481 fqcqkcdraf srsdhlalhm krhf

**pkrgrr: NLS**
